# Supplementary material for: Chemical Genetics Reveals Bacterial and Host Cell Functions Critical for Type IV Effector Translocation by Legionella pneumophila
Source: PLoS Pathog. 2009 Jul 3;5(7):e1000501. doi: 10.1371/journal.ppat.1000501 (PMC2698123; doi:10.1371/journal.ppat.1000501)
Supplement: Table S2 — List of the 86 molecules from the initial screening which showed more than 50% of inhibition. (0.04 MB XLS) [file ppat.1000501.s003.xls]

## Sheet: Sheet1
Collection	% Inhibition			Link	Human Trial	Can be given to Mice ?
Biomol	93.57	Helenelan, Helenalin is a sesquiterpene lactone found in Arnica species which has been used in traditional medicine for its anti-inflammatory activity. It inhibits NF-κB by specific and irreversible alkylation of the p65 subunit thereby blocking DNA binding. In TNFα-stimulated Jurkat cells treated with helenalin (10µM), IκB degradation leads to the translocation of inactive NF-κB to the nucleus	NF-kappaB inhibitors
Biomol	90.7527	NSC-95397. A potent and selective inhibitor of Cdc25 phosphatase (Ki's for Cdc25A, B and C are 32, 96 and 40 nM respectively)1. NSC-95397 inhibits the growth of several human tumor cell lines and blocks G2/M cell cycle transition.	CDC25	review on cdc25
Biomol	90.62	FCCP, Carbonylcyanide-4-(trifluoromethoxy)-phenylhydrazone. A potent reversible inhibitor of mitochondrial oxidative phosphorylation. FCCP is a useful tool for depolarizing mitochondrial membrane potential. Treatment of cells with FCCP at varying concentrations leads to partial (100 nM) or complete (10 µM) depolarization and apoptosis	Mitochondria-induced apoptosis
Biomol	90.343	DPI (Diphenyleneiodonium Chloride) is a potent, irreversible inhibitor of NO synthase (NOS). It has been shown to inhibit NOS in cultured peritoneal macrophages (IC50=30 nM) as well as block acetylcholine-induced relaxation of rabbit aortic rings (IC50=0.3 µM). DPI also inhibits other NADPH-utilizing flavoproteins such as NADPH oxidase of human neutrophils and macrophages and represents a new cla…	NOS inhibitors	Biomol link
Biomol	88.4938	MBCQ, Biomol PD-149, Selective inhibitor of cGMP-specific phosphodiesterase	Phosphodiesterase inhibitors	Biomol link
Biomol	88.4838	Cytochalasin D	Actin inhibitors
Biomol	87.9752	Latrunculin B s a structurally unique marine toxin isolated from the Red Sea sponge Latrunculia magnifica. It inhibits actin polymerization and disrupts microfilament organization as well as microfilament-mediated processes and is 10- to 100-fold more potent than the cytochalasins.	Actin inhibtors
Biomol	87.9208	AG-126 prevents lipopolysaccharide-induced lethal toxicity (septic shock) in mice. Administered at 1.5 mg/mouse, it reduced LPS-induced lethal toxicity from 95% to 10%. AG-126 greatly reduces LPS-induced tyrosine phosphorylation of p42MAPK in murine perit	Tyrosine kinase inhibitors	Biomol link		Yes
Biomol	86.857	Furoxan, A novel NO donor which only releases NO in the presence of thiols. It is a potent vasodilator and inhibitor of platelet aggregation	NO donor
Biomol	85.3456	TPCK, Na-Tosyl-Phe-chloromethylketone. rreversible inhibitor of chymotrypsin-like serine proteases such as granzyme D. Inhibits LPS-induced expression of COX-2 in macrophages. Inhibits γ-irradiation-induced apoptosis in myeloid leukemic cells	Other, Granzyme D inhibitor	Biomol link
Biomol	85.2559	BAY 11-7082, An irreversible inhibitor of cytokine-inducible IκBα phosphorylation (IC50=10 µM). In intact HUVECs it inhibits TNFα-induced phosphorylation and degradation of IκBα without affecting constitutive phosphorylation. Inhibition of IκBα phosphoryl	NF-kappaB inhibitors	Biomol link		Yes
Biomol	84.9226	Tanshinone IIA. GR-336,It inhibits AP-1 activity by suppressing jun-fos-DNA complex formation (IC50=0.22 µM), It displays anti-inflammatory activity and induces apoptosis in a variety of cell lines. Tanshinone IIA inhibits LPS-induced NF-kappaB activation in RAW 264.7 cells	AP-1 Inhibitors	Biomol link
Biomol	82.6976	PI-110, potent irreversible mechanism based serine protease inhibitor. Inhibits granzymes A, B, and H2-4 and cathepsin G5. Inhibits activation of neutral sphingomyelinase and apoptosis triggered by daunorubicin as well as camptothecin-induced apoptosis	Granzyme inhibitors	Biomol link
Biomol	81.6704	Staurosporine, Staurosporine inhibits a variety of kinases including PKA (Ki=7.0 nM), PKG (Ki=8.5 nM), MLCK (Ki=1.3 nM), PKC (Ki=0.7 nM), CaMK (IC50=20 nM), tyrosine kinases (IC50=70 nM) and phosphorylase kinase (IC50=0.5 nM). Inhibition is via interacti	Kinase inhibitor. Inducer of apoptosis
Biomol	81.1779	Parthenolide, Sesquiterpene lactone and active principle of feverfew (Chrysanthemum parthenium) which is widely used as an herbal remedy for arthritis and migraine. Has anti-inflammatory, antisecretory and spasmolytic activity. Inhibits the release of various mediators, and inhibits activation of MAP kinase and NF-κB. Recent findings indicate that parthenolide binds to and directly inhibits IκB k…	NF-kappaB inhibitors			Yes
Biomol	80.4719	HA14-1 is a novel cell-permeable low molecular weight Bcl-2 ligand which antagonizes its function and induces apoptosis. In HL-60 cells 50 µM HA14-1 effectively induced apoptosis associated with loss of mitochondrial membrane potential and activation of caspases -9 and -3	Mitochondria-mediated apoptosis
Biomol	79.913	Manoalide is a marine sesterterpenoid isolated from Luffariella variabilis. It irreversibly inhibits human synovial fluid PLA2. It inhibits human recombinant sPLA2 selectively over cPLA2. It inhibits the release of arachidonate in cultured mouse peritoneal macrophages and in a mouse in vivo model. Its mechanism of action involves covalent modification of lysine residues. Also inhibits PLC and cal…	Phospholipase inhibitor
Biomol	79.7198	Tyrphostin 9 is a selective inhibitor of the PDGF receptor tyrosine kinase (IC50=1.2 µM). It is also a potent (10 nM) uncoupler of oxidative phosphorylation	Platelet-derived Growth Factor Receptor	Biomol link
Biomol	76.403	U-73122 Inhibits agonist induced phospholipase C (PLC) activation (IC50=1.0-2.1 µM) in human platelets and neutrophils. It also inhibits agonist induced down-regulation of muscarinic receptors in SK-N-SH neuroblastoma cells. It is a useful tool to investigate receptor-mediated PI turnover in signal transduction	Phospholipase inhibitor
Biomol	75.9069	Manumycin A, Inhibits farnesyltransferase (IC50=5 µM) selectively over geranylgeranyl-transferase (IC50=180 µM). Also found to inhibit IKK.	Farnesylation inhibitor	JBC
Biomol	74.404	Wiskostatin. A selective, reversible inhibitor of N-WASP (neural Wiskott-Aldrich syndrome protein) that selectively blocks actin filament assembly. Appears to bind to N-WASP, stabilize the autoinhibited conformation and prevent the activation of Arp2/3 (actin-related protein 2/3) complex	Actin inhibtors
Biomol	74.2795	Cytochalasin D is a cell-permeable fungal toxin which binds to the barbed end of actin filaments inhibiting both the association and dissociation of subunits. It causes the disruption of actin filaments and inhibition of actin polymerization	Actin inhibtors
Biomol	74.2441	RWJ-60475-(AM)3 is a cell-permeable acetoxymethyl (AM) ester of RWJ-60475. RWJ-60475 is an inhibitor of the CD45 tyrosine phosphatase (IC50=2 µM). It is a hydrolytically stable bioisostere of phosphotyrosine which binds to the catalytic site of CD45.	CD45 tyrosine phosphatase inhibitor
Biomol	67.5967	SU 4312. 3-(4-Dimethylamino-benzylidene)-1,3-dihydro-indol-2-one. A potent and selective inhibitor of VEGFR-2 (Flk-1, KDR). It displays a 100-fold greater potency for the unactivated form of the kinase (Ki=0.04 µM) compared to the activated form (Ki=4 µM)	VEGF inhibitor
Biomol	66.6627	Induribin-3'-monoxime. A potent inhibitor of glycogen synthase kinase-3β (IC50=22 nM). Also inhibits CDK1 (p34cdc2; IC50=180 nM) and CDK5 (IC50=100 nM)1. It reversibly arrests asynchronous HBL-100 cells at G22. Induces apoptosis in the mammary carcinoma cell line MCF-7 (10 µM)	CDK inhibitor. Inducer of apoptosis.
Biomol	63.3109	W-7. Binds to calmodulin, inhibiting Ca2+-calmodulin-regulated enzyme activity. It inhibits the Ca2+/calmodulin-induced activation of myosin light chain kinase in a concentration dependent manner (IC50=25 µM)	Calmodulin inhibitor
Biomol	61.5317	Trifluoperazine·2HCl (Stelazine). Facilitates agonist-induced elevation of cytosolic calcium at low concentrations (10 µM). Antagonizes calmodulin at higher concentrations	Calmodulin inhibitor
Biomol	61.435	1,2-Didecanoylglycerol. A membrane permeable but non-physiologic DAG	PKC activators
Biomol	60.3581	Chelerythrime Cholride. Reported to be a potent and selective inhibitor of protein kinase C1 (IC50=0.66 µM). Although chelerythrine has numerous documented biological effects, recent studies have raised serious doubts about the effectiveness of chelerythrine as a PKC inhibitor	PKC inhibitor ?
Biomol	60.3056	Calcimycin. Highly selective calcium ionophore. Useful tool for increasing intracellular Ca2+ concentration	Ionophores
Biomol	58.7177	DBHQ (2,5-Di-tert-butylhydroquinone) induces the release of Ca2+ from agonist-sensitive and agonist-insensitive intracellular stores without increasing IP3 levels. Its mode of action is via inhibition of endoplasmic reticulum Ca2+-ATPase. It induced a rapid increase in cytosolic Ca2+ concentration in isolated rat hepatocytes (EC50=1-2 µM).	SERCA (calcium pumps)
Biomol	57.8798	Ebselen, Novel selenium-containing anti-inflammatory agent. Inhibits 5-LO, CO, NADPH oxidase, and protein kinase C. Potent antioxidant. Possesses a unique glutathione peroxidase-like activity	Anti-inflammatory
Biomol	56.5375	AG-879. Member of the tyrphostin family of tyrosine kinase inhibitors, inhibits NGF receptor (pp140c-trk) autophosphorylation selectively with no inhibition of EGF or PDGF receptor phosphorylation (IC50=10 µM)1. AG-879 inhibits NGF-induced neurite outgrowth in PC12 cells	Nerve growth factor
Biomol	55.2218	Wortmannin, a fungal metabolite, is a potent and selective inhibitor of phosphatidylinositol 3-kinase. Wortmannin covalently binds to PI 3-kinase and is selective, inhibiting other kinases such as PI 4-kinase and myosin light chain kinase at concentrations 100 fold higher than that required for inhibition of PI 3-kinase.	PI 3-kinase inhibitors
Biomol	54.438	Calyculin A is a structurally unique marine toxin with potent and specific protein phosphatase inhibiting activity (see references 1 and 2 for reviews on protein phosphatases). It inhibits PP2A with similar potency to okadaic acid (IC50=0.5-1.0 nM) but inhibits PP1 with a 10- to 100-fold greater potency. Inhibits apoptosis	Protein phosphatase inhibitors
Biomol	53.4936	12(S),20-DiHETE	PKC inhibitor
Biomol	53.4656	Phenoxybenzamine•HCl. Irreversibly inhibits calmodulin1. Cell permeable. Selective α-adrenergic blocker.	Calmodulin inhibitor
Biomol	52.4812	CAPE (Caffeic Acid Phenethylester) is a phenolic antioxidant derived from honeybee propolis. It inhibits phorbol ester-induced tumor promotion in mouse skin. Induces DNA fragmentation and apoptosis in cloned rat embryo fibroblast cells transformed by diverse oncogenes. Inhibits nuclear translocation of NF-κB possibly via anti-oxidant effects	NF-kappaB inhibitors
Biomol	52.4111	Shikonin is a naphthoquinone found in the Chinese herb Shiunko. It inhibits TNF-α- and B6 melanoma-induced angiogenesis in mice. It blocks expression of integrin αvβ3 and inhibits endothelial cell proliferation and migration in vitro.	Angiogenesis inhibitor
Biomol	51.936	Mas 7. A mastoparan analog with 5-fold greater potency than mastoparan. Mastoparan is an amphiphilic wasp venom, tetradecapeptide capable of directly activating G proteins by a mechanism analogous to that of G protein-coupled receptors. It is cell permeable and acts preferentially on Gi and Go rather than Gs. It stimulates exocytosis and phosphoinositide breakdown in a variety of cells. It inhibi…	G protein effector
Biomol	51.5587	YC-1. An NO-independent, superoxide-sensitive, cell-permeable stimulator of soluble guanylyl cyclase, EC50=18.6 µM. It induced a concentration-dependent increase in cGMP levels in cultured rat aortic VSMC and relaxed preconstricted endothelium-denuded rabbit aortic rings (50% at 20 µM). It inhibits both initial and long term platelet adhesion to collagen. Inhibits HIF-1α activity in tumors. This …	Guanylate cyclase activator
Biomol	50.4988	Gliotoxin. his immunomodulatory fungal toxin inhibits the chymotrypsin-like activity of the 20S proteasome in a noncompetitive manner. Nanomolar concentrations of gliotoxin inhibit the activation of NFκB in response to a variety of stimuli in T and B cells. It induces apoptosis in a variety of cells including neutrophils, eosinophils and granulocytes3 and displays anti-inflammatory activity in vi…	Inhibitors of Proteasome Chymotrypsin-like Activity
Biomol	49.9763	LY 294002 is a potent and specific cell-permeable inhibitor of phosphatidylinositol 3-kinase (PI 3-kinase). In in vitro assays using purified PI 3-kinase, LY 294002 displays an IC50 of 1.4 µM and inhibits all isoforms equally. Other kinases such as PKC, PKA, MAP kinase, S6 kinase, EGF receptor tyrosine kinase, c-src kinase, PI 4-kinase, diacylglycerol kinase or rabbit kidney ATPase are not inhibi…	PI 3-kinase inhibitors
Biomol	49.6182	Nifedipine, selectively blocks the voltage-sensitive (L-type) calcium channel	Calcium channel modulator
Biomol	48.1564	β-Lapachone. Novel DNA topoisomerase I inhibitor. Induces apoptosis in HL-60 and human prostate cancer cells via a p53-independent mechanism and blocks the cell cycle at G0/G1	Apoptosis inducer
NINDS	96.9602	PHENYLMERCURIC ACETATE	antifungal
NINDS	96.2402	PATULIN	antibacterial
NINDS	93.6639	Celastrol	antineoplastic, antiinflamatory, NO synthesis inhibitor, chaperone stimulant, NF-kappaB inhibitor	short comment	In process	Yes
NINDS	89.8564	BENZYL ISOTHIOCYANATE	antineoplastic, antibacterial, antifungal
NINDS	87.4279	THIMEROSAL	antiinfective, preservative
NINDS	85.474	2,6-DIMETHOXYQUINONE	antibacterial, induces dermatitis, mutagen
NINDS	84.8477	BACITRACIN	antibacterial
NINDS	84.8252	SANGUINARINE SULFATE	antineoplastic, antiplaque agent
NINDS	83.893	PHENYLBUTAZONE binds to and inactivates prostaglandin H synthase and prostacyclin synthase through peroxide (H2O2) mediated deactivation. The reduced production of prostaglandin leads to reduced inflammation of the surrounding tissues.	antiinflammatory
NINDS	83.2601	MENADIONE	prothrombogenic agent
NINDS	81.5349	BENZALKONIUM CHLORIDE	antiinfective (topical)
NINDS	81.4078	ALEXIDINE HYDROCHLORIDE	antibacterial
NINDS	81.2981	NOVOBIOCIN SODIUM	antibacterial
NINDS	79.5879	GAMBOGIC ACID	antiinflammatory, cytotoxic, inhibits HeLa cells in vitro; LD50(rat) 88 mg/kg ip
NINDS	72.2904	CRASSIN ACETATE	antiviral
NINDS	70.0779	CITRININ	antibacterial
NINDS	69.7659	PERHEXILINE MALEATE	coronary vasodilator
NINDS	65.9444	PERPHENAZINE	antipsychotic
NINDS	65.606	OXIBENDAZOLE	anthelmintic
NINDS	64.6874	PARAROSANILINE PAMOATE	anthelmintic, antischistosomal
NINDS	63.4063	SODIUM SALICYLATE	keratolytic, antiseptic
NINDS	61.3299	DEGUELIN(-)	antineoplastic, antiviral, insecticide
NINDS	61.255	CETRIMONIUM BROMIDE	antiinfectant
NINDS	58.609	NORSTICTIC ACID	antibacterial
NINDS	53.4573	SULOCTIDIL	peripheral vasodilator
NINDS	53.38	PICROPODOPHYLLOTOXIN	antineoplastic; 10% cytotoxicity of podophyllotoxin
Prestwick	97.6316	ICCB 602109	Anthelmintics
Prestwick	93.0788	Sanguinarine nitrate	Antibacterial agents
Prestwick	91.887	Parthenolide, Sesquiterpene lactone and active principle of feverfew (Chrysanthemum parthenium) which is widely used as an herbal remedy for arthritis and migraine. Has anti-inflammatory, antisecretory and spasmolytic activity. Inhibits the release of various mediators, and inhibits activation of MAP kinase and NF-κB. Recent findings indicate that parthenolide binds to and directly inhibits IκB k…	NF-kappaB inhibitors
Prestwick	86.3298	Same as Biomol LE009, 9,10-EODE-leukotoxin A. Biosynthesis in leukocytes1, burned skin and lung lavages of patients with adult respiratory distress syndrome1. Displays an uncoupling effect on mitochondrial respiration and potent relaxation of rat stomach smooth m
Prestwick	81.8127	12(S),20-DiHETE	PKC inhibitor
Prestwick	65.0832	Albendazole. It has inhibitory effect on tubulin polymerization which results in the loss of cytoplasmic microtubules.	Tubulin inhibitors
Prestwick	60.1099	Fendeline hydrochloride. Acts as an antagonist of proteins with calmodulin regulated protein kinase activity	Calmodulin inhibitors
Prestwick	57.4384	Piperlongumine. Alkaloid.
Prestwick	57.4139	Podofilox, also called podophyllotoxin, is a purer and more stable form of podophyllin in which only the biologically active portion of the compound is present. Podofilox is used to remove certain types of warts on the outside skin of the genital areas. The exact mechanism of action is unknown.
Prestwick	56.1345	Alexidine Hydrochloride	Antibacterial agents
Prestwick	54.5355	Phenoxybenzamine produces its therapeutic actions by blocking alpha receptors, leading to a muscle relaxation and a widening of the blood vessels. This widening of the blood vessels results in a lowering of blood pressure.
Prestwick	54.5176	Methiazole
Prestwick	54.0583	Fenbendazole. It binds to 3-tubulin astructural protein that blocks polymerization of tubulin into microtubules, which damages the integrity and the transport function of cells in parasites. The reason behind the wide safety margin is due to its affinity to the parasitic tubules rather than mamilian.	Tubulin inhibitors
Prestwick	50.2317	Methixene hydrochloride. Anticholinergic agent.
